# Supplementary material
Source: publisher figshare collection journal article supplement (https://tandf.figshare.com/ndownloader/files/16860830)
Supplement: Supplementary file 1 [file 16860830]

**Supplementary material.**

**
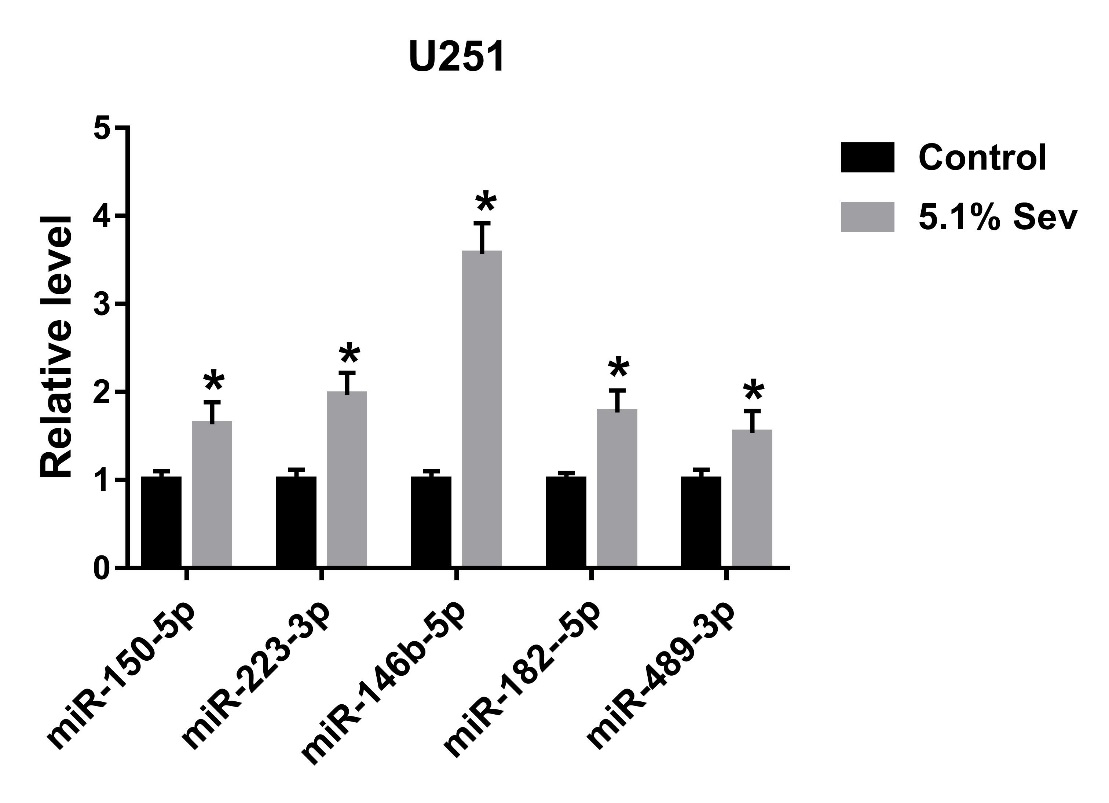
**

**Supplementary Figure**. The expression levels of five miRNAs down-regulated in glioma were measured in U251 cells after treated with 5.1% sevoflurane by qRT-PCR. **P*<0.05, compared with Control group.
